# Supplementary material for: Variations in the Biological Functions of HIV-1 Clade C Envelope in a SHIV-Infected Rhesus Macaque during Disease Progression
Source: PLOS journal article supplement (doi:10.1371/journal.pone.0066973), 2013-06-26

Fig S3

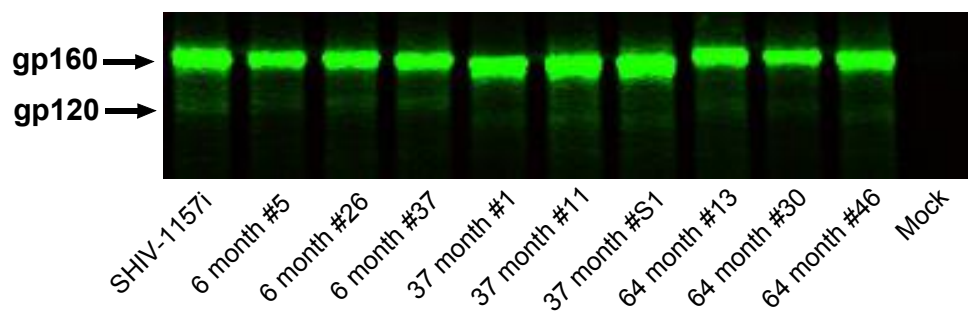

Supplement: S3 (10.1371/journal.pone.0066973.s003) [file journal.pone.0066973.s003]
